# Supplementary material for: Insight into the generation of near infra-red (NIR) absorbing species in electrochromic surface-anchored metal–organic frameworks
Source: Royal Society of Chemistry journal article supplement (doi:10.1039/d3dt03822j), 2023-12-15
Supplement: d3dt03822j1.pdf [file d3dt03822j1.pdf]

# Insight on the generation of near infra-red (NIR) absorbing species in electrochromic Surface-anchored Metal-Organic Frameworks

Antoine Mazel<sup>1</sup>, Matteo Fornasarig<sup>2</sup>, Josianne Owona<sup>2,3</sup>, Lionel Truflandier<sup>2</sup>, Frédéric Castet<sup>2</sup>, Aline Rougier<sup>1</sup>

<sup>1</sup>Univ. Bordeaux, CNRS, Bx INP, ICMCB, UMR 5026, F-33600 Pessac, France

<sup>2</sup>Univ. Bordeaux, CNRS, Bx INP, ISM, UMR 5255, F-33405 Cedex Talence, France

<sup>3</sup>Donostia International Physics Center (DIPC), Manuel Lardizabal Ibilbidea 4, 20018 Donostia, Euskadi, Spain

## Supporting information

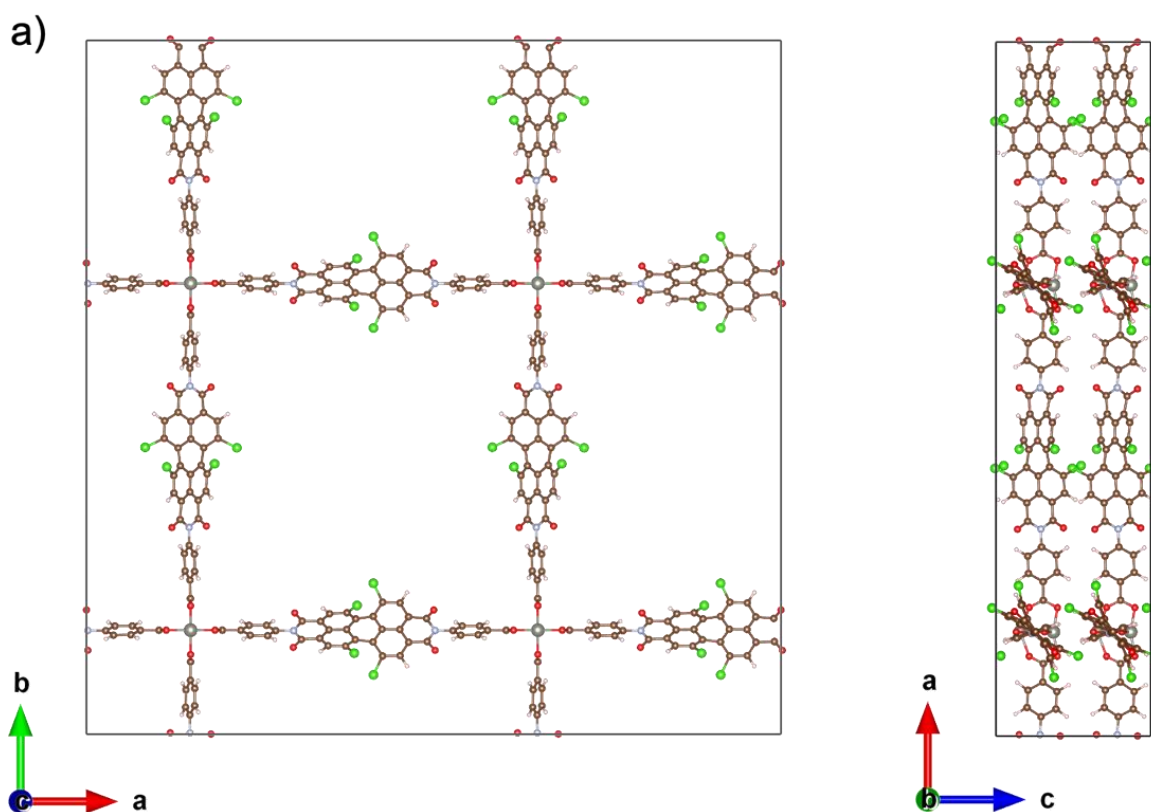

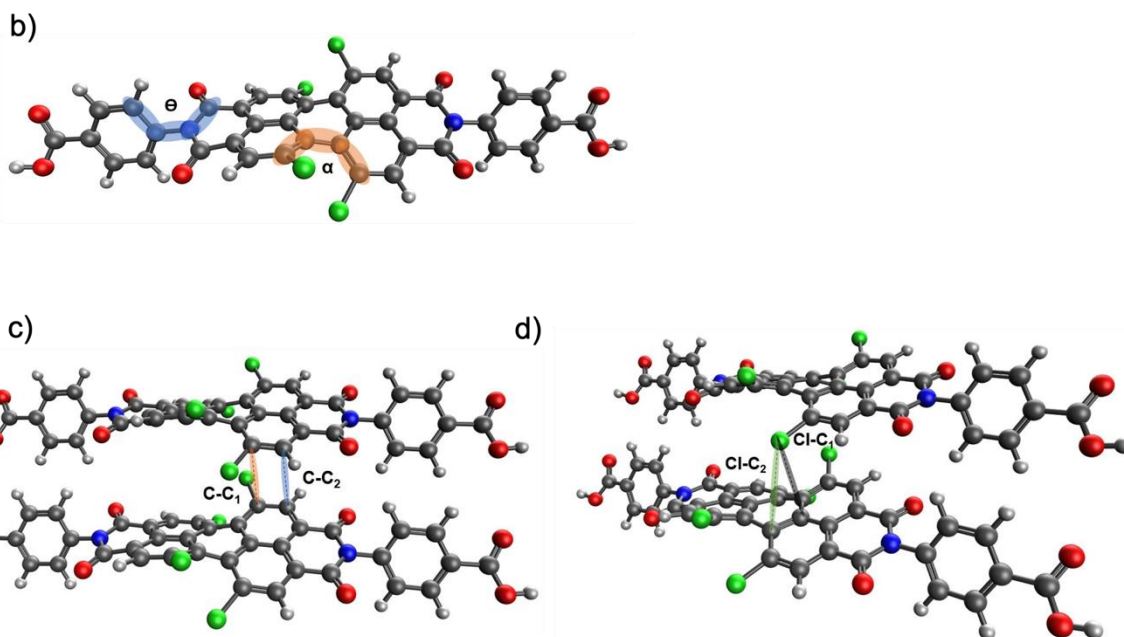

Figure S1: a) Calculated crystal unit cell; b) Structure of a PDI organic ligand extracted from the optimized crystal unit cell, with definition of the dihedral angles  $\alpha$  (yellow) and  $\Theta$  (blue); c) and d) Shortest C-C and C-Cl distances between neighbouring PDI units.

Table S1: Calculated unit cell parameters  $a$ ,  $b$  and  $c$  (Å), dihedral angles ( $\alpha$  and  $\Theta$ , degrees), and shortest interlayer C-C and C-Cl distances (Å) – see Figure S1 for angles and distances definition.

| $a$   | $b$   | $c$   | $\alpha$      | $\Theta$      | C-C <sub>1</sub> | C-C <sub>2</sub> | Cl-C <sub>1</sub> | Cl-C <sub>2</sub> |
|-------|-------|-------|---------------|---------------|------------------|------------------|-------------------|-------------------|
| 56.10 | 56.11 | 12.47 | 31.2-<br>30.7 | 55.0-<br>64.0 | 3.46             | 3.34             | 3.50              | 3.85              |

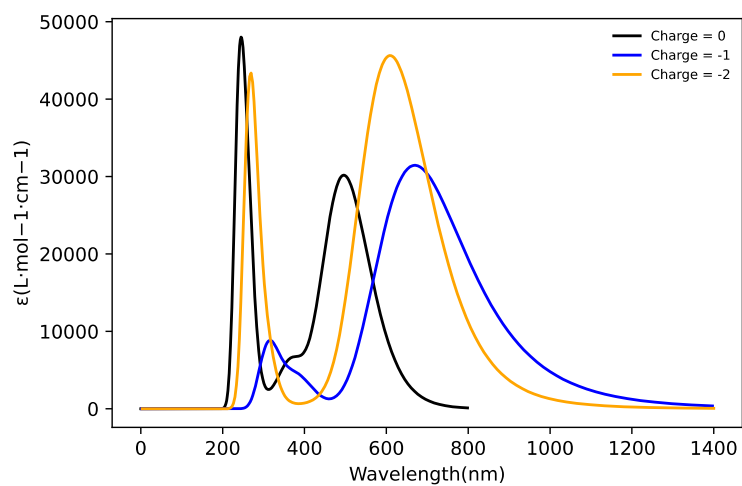

Figure S2: Absorption spectra of the neutral and reduced states of a PDI ligand extracted from the optimized crystal structure, as calculated at the CAM-B3LYP/6-311+G(d) level.

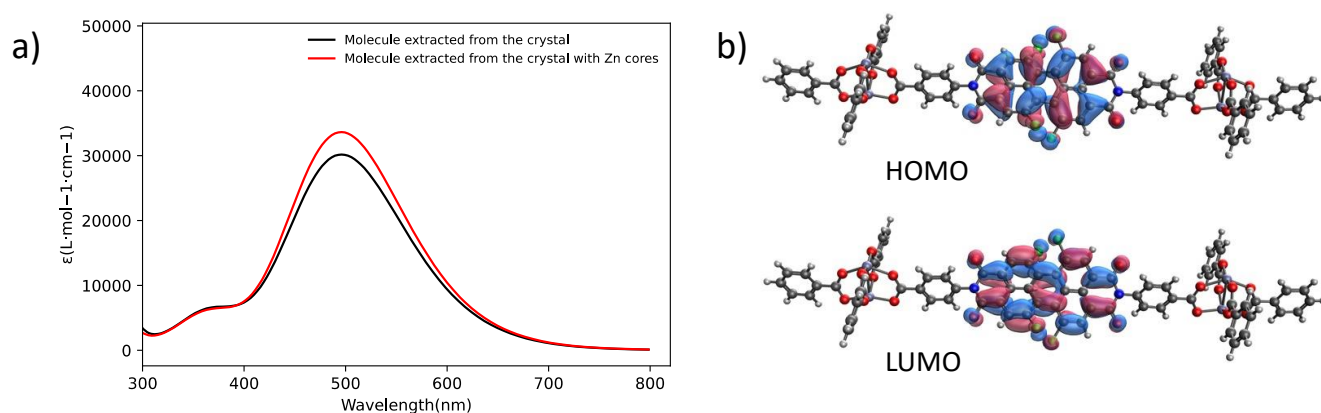

Figure S3: a) Absorption spectra of a PDI ligand extracted from the optimized crystal structure (black), and of the same ligand connected on both sides to a metallic node, as calculated at the CAM-B3LYP/6-311+G(d) level. The lowest-energy band is due to an electron excitation from the highest occupied molecular orbital (HOMO) to the lowest occupied one (LUMO), represented in b).

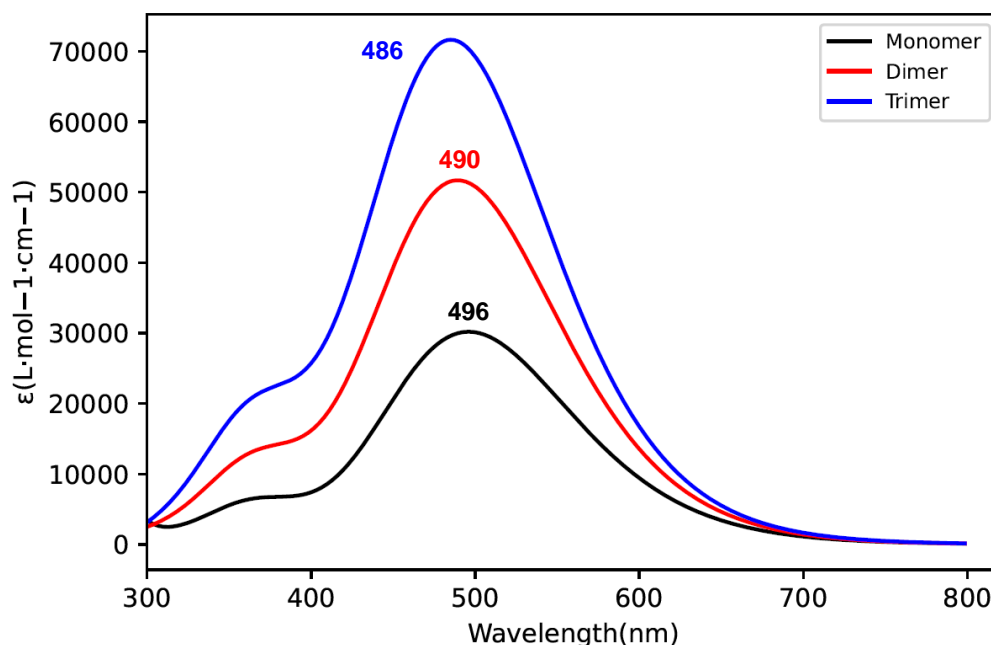

Figure S4: Absorption spectra of a PDI monomer (black), dimer (red) and trimer (blue) extracted from the optimized crystal structure, calculated at the CAM-B3LYP/6-311G(d) level.
